# Supplementary material
Source: MDPI journal article supplement (https://www.mdpi.com/2073-445X/10/8/876)
Supplement: s1 [file s1 › land-1326775-supplementary.pdf]

Supplementary material for *A Novel Model for Detecting Urban Fringe and Its Expanding Patterns: An Application in Harbin City, China*

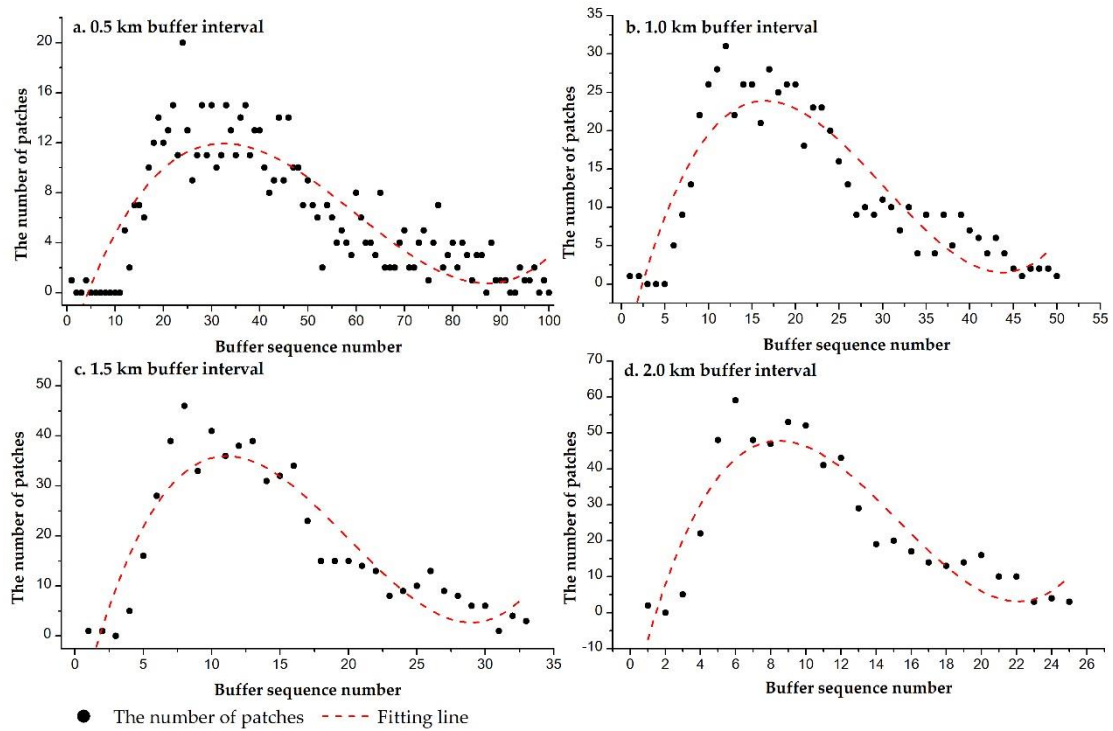

**Figure S1.** The distribution of the number of patches in 1991 with different buffer intervals.

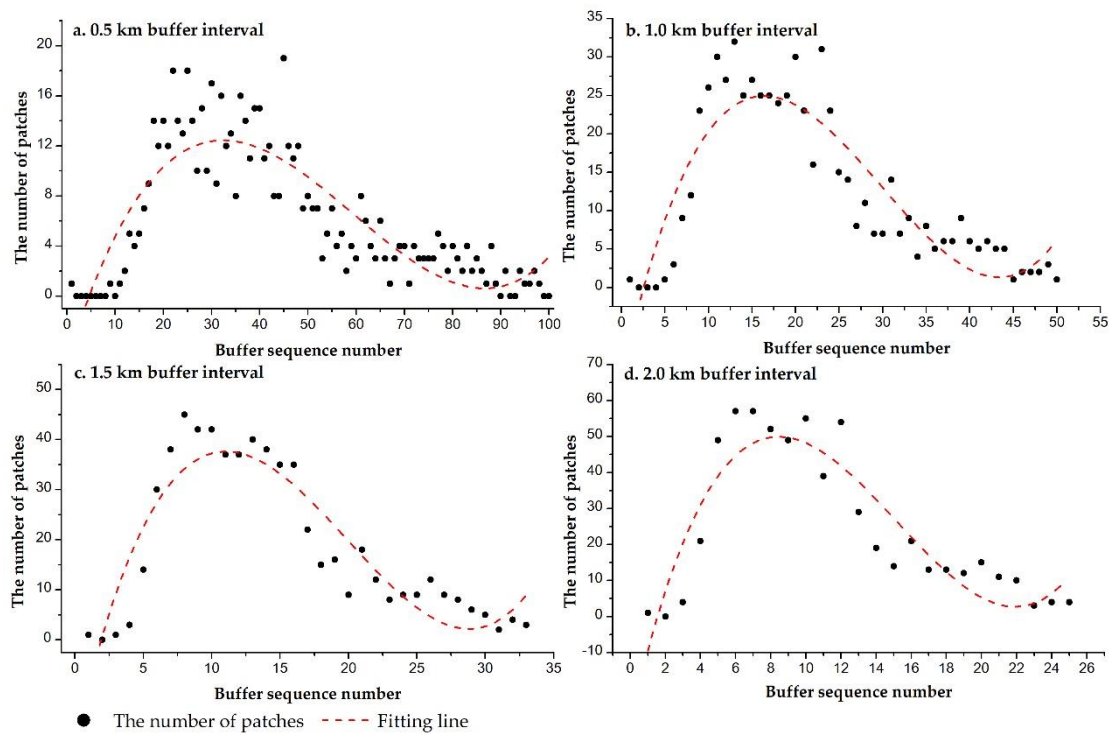

**Figure S2.** The distribution of the number of patches in 2000 with different buffer intervals.

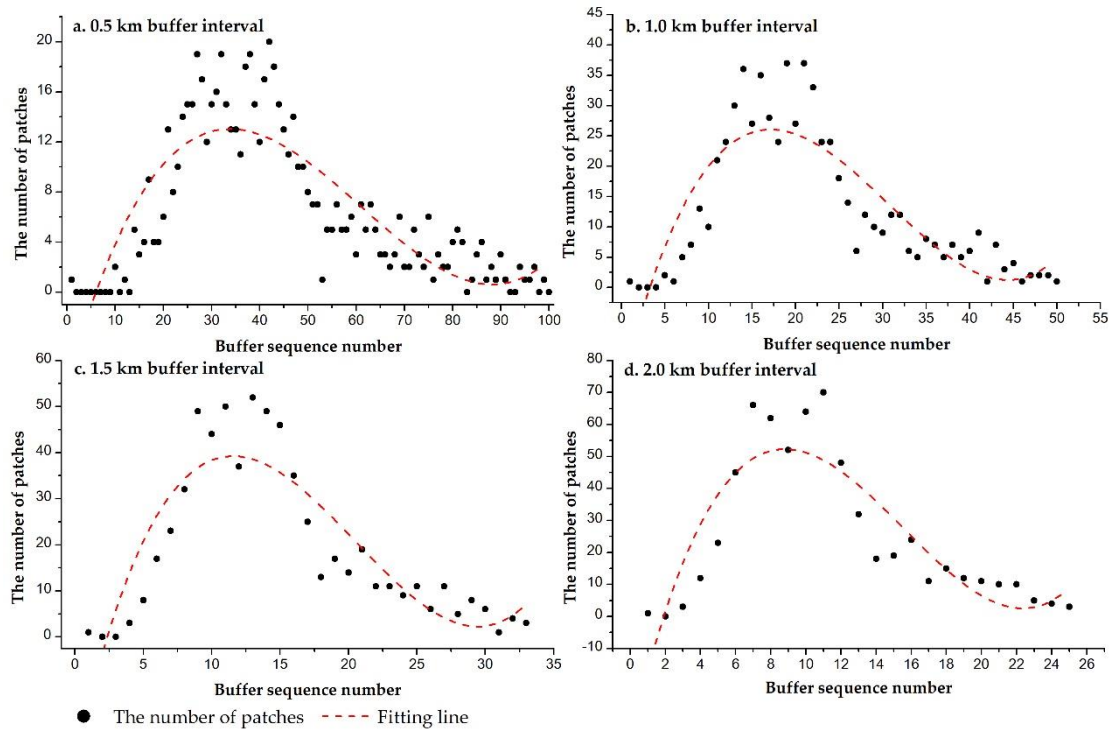

**Figure S3.** The distribution of the number of patches in 2010 with different buffer intervals.

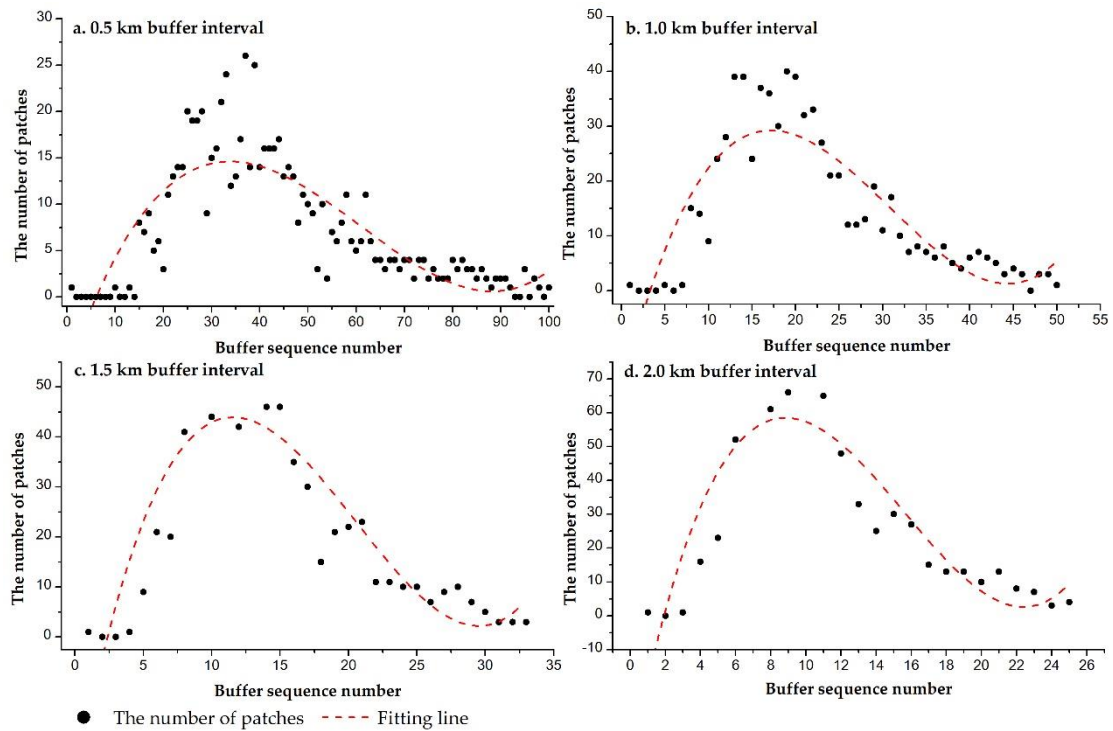

**Figure S4.** The distribution of the number of patches in 2015 with different buffer intervals.

**Table S1.** The fitting function and  $R^2$  summary.

| Year | Buffer interval | Fitting functions                        | $R^2$ |
|------|-----------------|------------------------------------------|-------|
| 1991 | 0.5 km          | $y=0.00014x^3-0.02456x^2+1.1617x-4.5633$ | 0.741 |
|      | 1.0 km          | $y=0.00219x^3-0.19838x^2+4.7489x-10.298$ | 0.814 |
|      | 1.5 km          | $y=0.01158x^3-0.69595x^2+11.155x-17.908$ | 0.837 |
|      | 2.0 km          | $y=0.03546x^3-1.6258x^2+19.921x-25.804$  | 0.833 |
| 2000 | 0.5 km          | $y=0.00016x^3-0.02771x^2+1.2875x-5.4555$ | 0.734 |
|      | 1.0 km          | $y=0.00264x^3-0.23072x^2+5.3809x-12.63$  | 0.793 |
|      | 1.5 km          | $y=0.0126x^3-0.75353x^2+12.031x-20.297$  | 0.835 |
|      | 2.0 km          | $y=0.0387x^3-1.7631x^2+21.511x-29.259$   | 0.818 |
| 2010 | 0.5 km          | $y=0.00016x^3-0.02869x^2+1.3948x-7.3946$ | 0.718 |
|      | 1.0 km          | $y=0.00257x^3-0.23447x^2+5.749x-16.427$  | 0.749 |
|      | 1.5 km          | $y=0.01289x^3-0.79289x^2+13.153x-26.747$ | 0.783 |
|      | 2.0 km          | $y=0.04025x^3-1.8818x^2+23.8x-38.785$    | 0.780 |
| 2015 | 0.5 km          | $y=0.00018x^3-0.03213x^2+1.5651x-8.3687$ | 0.701 |
|      | 1.0 km          | $y=0.0029x^3-0.2646x^2+6.49x-18.759$     | 0.763 |
|      | 1.5 km          | $y=0.01442x^3-0.88853x^2+14.766x-30.268$ | 0.772 |
|      | 2.0 km          | $y=0.04484x^3-2.1006x^2+26.616x-43.59$   | 0.797 |
